# Supplementary material for: Melatonin Regulates Iron Homeostasis by Inducing Hepcidin Expression in Hepatocytes
Source: MDPI journal article supplement (doi:10.3390/ijms23073593), 2022-03-25
Supplement: s1 [file s1]

# Supplementary Figure S1

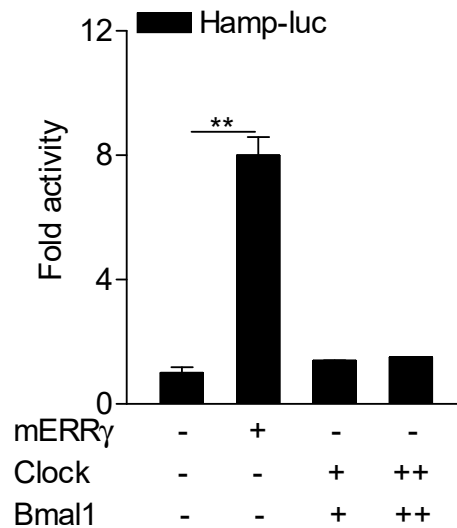

**Figure S1.** Circadian clock genes did not alter hepcidin promoter activity. HepG2 cells were co-transfected with mHamp-luc (200 ng) and vectors expressing Bmal1 (+: 100 ng, ++: 300 ng), Clock (+: 100 ng, ++: 300 ng) and mERRγ (+: 100 ng, as a positive control). Data are presented as means ± SD. \*\*  $P < 0.01$  using two-tailed Student's *t*-test.

Table S1. Q-PCR primer sequence and accession number for genes used in this study.

| Gene name       | Forward (5'-3')       | Reverse(5'-3')       | Accession number |
|-----------------|-----------------------|----------------------|------------------|
| <i>Bmal1</i>    | AACCTTCCCGCAGCTAACAG  | AGTCCTCTTTGGGCCACCTT | XM_030242022.2   |
| <i>Per1</i>     | GCTTCGTGGACTTGACACCT  | TGCTTTAGATCGGCAGTGGT | NM_011065.5      |
| <i>Hepcidin</i> | TGCCTGTCTCCTGCTTCTCCT | GATGGGGAAGTTGGTGTCTC | NM_032541.2      |
| <i>MT1</i>      | TACACTGTCAAGTCAGCGCA  | GGGCATGATGGCGATGAG   | NM_008639.3      |
| <i>MT2</i>      | ATCCAGACAGCCAGCACA    | TGCGCAAATCACTCGGTC   | NM_145712.2      |
| <i>L32</i>      | TCTGGTGAAGCCCAAGATCG  | CTCTGGGTTTCCGCCAGT   | NM_172086.2      |
| Chip-AP-1       | CTGGCTGTAGGTGACACAAC  | AAGGACTTGTGTGGTGGCTG |                  |
| <i>mERRγ</i>    |                       |                      | NM_001357534.1   |
| <i>Clock</i>    |                       |                      | XM_030254102.2   |
